# Supplementary material
Source: HighWire-hosted journal article supplement (http://ajnr-stage2.highwire.org/highwire/filestream/52174/field_highwire_adjunct_files/0/2520_table.pdf)
Supplement: 2520_table.pdf [file 2520_table.pdf]

**On-line Table. MR imaging findings of benign and malignant parotid tumors**

| Discriminating Features         | Benign Tumors ( <i>n</i> = 57) (%) |          |                   | Malignant Tumors ( <i>n</i> = 27) (%) |          |                  | <i>P</i> Value, Fisher Exact Test | Accuracy to Predict Malignancy |
|---------------------------------|------------------------------------|----------|-------------------|---------------------------------------|----------|------------------|-----------------------------------|--------------------------------|
|                                 | Positive                           | Negative | Positive (1-SPEC) | Positive                              | Negative | Positive (SENSE) |                                   |                                |
| Male sex                        | 29                                 | 28       | 50.9%             | 14                                    | 13       | 51.9%            | 1.0000                            | 50.0%                          |
| Signal intensity                |                                    |          |                   |                                       |          |                  |                                   |                                |
| T1 −                            | 37                                 | 20       | 64.9%             | 22                                    | 5        | 81.5%            | .1355                             | 50.0%                          |
| T1 +                            | 5                                  | 52       | 8.8%              | 3                                     | 24       | 11.1%            | .7078                             | 65.5%                          |
| T1 ++                           | 11                                 | 46       | 19.3%             | 2                                     | 25       | 7.4%             | .2077                             | 57.1%                          |
| T2 −                            | 5                                  | 52       | 8.8%              | 7                                     | 20       | 25.9%            | .0483 <sup>a</sup>                | 70.2%                          |
| T2 +                            | 5                                  | 52       | 8.8%              | 6                                     | 21       | 22.2%            | .1622                             | 69.0%                          |
| T2 ++                           | 31                                 | 26       | 54.4%             | 8                                     | 19       | 29.6%            | .0383 <sup>a</sup>                | 40.5%                          |
| TIRM −                          | 1                                  | 56       | 1.8%              | 1                                     | 26       | 3.7%             | .5422                             | 67.9%                          |
| TIRM +                          | 6                                  | 51       | 10.5%             | 3                                     | 24       | 11.1%            | 1.0000                            | 64.3%                          |
| TIRM ++                         | 39                                 | 18       | 68.4%             | 16                                    | 11       | 59.3%            | .4655                             | 40.5%                          |
| Postcontrast                    |                                    |          |                   |                                       |          |                  |                                   |                                |
| Contrast 0                      | 2                                  | 55       | 3.5%              | 1                                     | 26       | 3.7%             | 1.0000                            | 66.7%                          |
| Contrast −                      | 10                                 | 47       | 17.5%             | 6                                     | 21       | 22.2%            | .7668                             | 63.1%                          |
| Contrast +                      | 17                                 | 40       | 29.8%             | 11                                    | 16       | 40.7%            | .3339                             | 60.7%                          |
| Contrast ++                     | 28                                 | 29       | 49.1%             | 9                                     | 18       | 33.3%            | .2399                             | 45.2%                          |
| Appearance                      |                                    |          |                   |                                       |          |                  |                                   |                                |
| Homogeneous SI T1               | 21                                 | 36       | 36.8%             | 11                                    | 16       | 40.7%            | .8115                             | 56.0%                          |
| Inhomogeneous SI T1             | 35                                 | 22       | 61.4%             | 16                                    | 11       | 59.3%            | 1.0000                            | 45.2%                          |
| Homogeneous SI postcontrast     | 16                                 | 41       | 28.1%             | 12                                    | 15       | 44.4%            | .1473                             | 63.1%                          |
| Inhomogeneous SI postcontrast   | 39                                 | 18       | 68.4%             | 15                                    | 12       | 55.6%            | .3302                             | 39.3%                          |
| Cystic/necrotic                 | 31                                 | 26       | 54.4%             | 11                                    | 16       | 40.7%            | .3502                             | 44.0%                          |
| Growth                          |                                    |          |                   |                                       |          |                  |                                   |                                |
| Defined margin                  | 46                                 | 11       | 80.7%             | 14                                    | 13       | 51.9%            | .0095 <sup>a</sup>                | 29.8%                          |
| Ill-defined margin              | 10                                 | 47       | 17.5%             | 12                                    | 15       | 44.4%            | .0155 <sup>a</sup>                | 70.2%                          |
| Defined margin postcontrast     | 45                                 | 12       | 78.9%             | 12                                    | 15       | 44.4%            | .0025 <sup>a</sup>                | 28.6%                          |
| Ill-defined margin postcontrast | 12                                 | 45       | 21.1%             | 16                                    | 11       | 59.3%            | .0010 <sup>a</sup>                | 72.6%                          |
| Focal                           | 20                                 | 37       | 35.1%             | 11                                    | 16       | 40.7%            | .6357                             | 57.1%                          |
| Polylobulated                   | 37                                 | 20       | 64.9%             | 10                                    | 17       | 37.0%            | .0200 <sup>a</sup>                | 35.7%                          |
| Diffuse                         | 1                                  | 56       | 1.8%              | 5                                     | 22       | 18.5%            | .0120 <sup>a</sup>                | 72.6%                          |
| Single                          | 51                                 | 6        | 89.5%             | 19                                    | 8        | 70.4%            | .0560                             | 29.8%                          |
| Multifocal                      | 6                                  | 51       | 10.5%             | 8                                     | 19       | 29.6%            | .0560                             | 70.2%                          |
| Unilateral                      | 55                                 | 2        | 96.5%             | 27                                    | 0        | 100.0%           | 1.0000                            | 34.5%                          |
| Bilateral                       | 2                                  | 55       | 3.5%              | 0                                     | 27       | 0.0%             | 1.0000                            | 65.5%                          |
| Superficial lobe                | 50                                 | 7        | 87.7%             | 16                                    | 11       | 59.3%            | .0047 <sup>a</sup>                | 27.4%                          |
| Deep lobe                       | 2                                  | 55       | 3.5%              | 4                                     | 23       | 14.8%            | .0810                             | 70.2%                          |
| Both lobes                      | 5                                  | 52       | 8.8%              | 7                                     | 20       | 25.9%            | .0483 <sup>a</sup>                | 70.2%                          |
| Spread                          |                                    |          |                   |                                       |          |                  |                                   |                                |
| Skin                            | 1                                  | 56       | 1.8%              | 3                                     | 24       | 11.1%            | .0955                             | 70.2%                          |
| Subcutaneous tissue             | 4                                  | 53       | 7.0%              | 9                                     | 18       | 33.3%            | .0034 <sup>a</sup>                | 73.8%                          |
| Masticator space                | 1                                  | 56       | 1.8%              | 5                                     | 22       | 18.5%            | .0120 <sup>a</sup>                | 72.6%                          |
| Carotid space                   | 0                                  | 57       | 0.0%              | 0                                     | 27       | 0.0%             | 1.0000                            | 67.9%                          |
| Perineural                      | 0                                  | 57       | 0.0%              | 5                                     | 22       | 18.5%            | 0.0026 <sup>a</sup>               | 73.8%                          |
| Maxillar bone                   | 0                                  | 57       | 0.0%              | 1                                     | 26       | 3.7%             | 0.3214                            | 69.0%                          |
| Lymphadenopathy                 | 2                                  | 55       | 3.5%              | 6                                     | 21       | 22.2%            | 0.0120 <sup>a</sup>               | 72.6%                          |
| Reader                          |                                    |          |                   |                                       |          |                  |                                   |                                |
| Malignant prediction            | 11                                 | 46       | 19.3%             | 18                                    | 9        | 66.7%            | 0.0005 <sup>a</sup>               | 76.2%                          |
| Correct diagnosis               | 40                                 | 17       | 70.2%             | 10                                    | 17       | 37.0%            | 0.0049 <sup>a</sup>               | 32.1%                          |

<sup>a</sup> *P* values for MR imaging signs that showed significant differentiation between benign and malignant tumors.

++ indicates strong hyperintensity/enhancement; +, moderate hyperintensity/enhancement; − hypointensity/low enhancement; 0, no enhancement.
